# Supplementary material
Source: publisher figshare collection journal article supplement (https://karger.figshare.com/articles/dataset/_/13499457)

**Supplementary online material 1.** Literature search strings.

MEDLINE® through PubMed®

("Biopsy"[MeSH Terms] AND ("Ultrasonography"[MeSH Terms] OR "Ultrasound"[tiab] OR "Radiography, Interventional"[MeSH Terms] OR "Tomography, X-Ray Computed"[MeSH Terms] OR "computed tomography"[tiab]) NOT "Endoscopic Ultrasound-Guided Fine Needle Aspiration"[MeSH Terms]) AND ("Pleural diseases"[MeSH Terms] OR "Pleura"[MeSH Terms] OR "pleural"[tiab] OR "pleura"[tiab]) NOT "Case Reports"[Publication Type] NOT "Review"[Publication Type]

EMBASE®

'biopsy' AND ('interventional ultrasonography' OR 'ultrasound' OR 'ultrasonograp\*':ti,ab OR 'ultrasound':ti,ab OR 'interventional radiology' OR 'computed tomography') NOT 'endoscopic ultrasound guided fine needle biopsy' AND ('pleura disease' OR 'effusion, pleura' OR 'pleurisy' OR 'pleural':ti,ab OR 'pleura':ti,ab) AND [humans]/lim NOT [review]/lim NOT 'case report'/de

**Fig. S1:** Graphical display of the revised Quality Assessment of Diagnostic Accuracy Studies (QUADAS-2) results, according to risk of bias and applicability concerns (A) and overall (B)

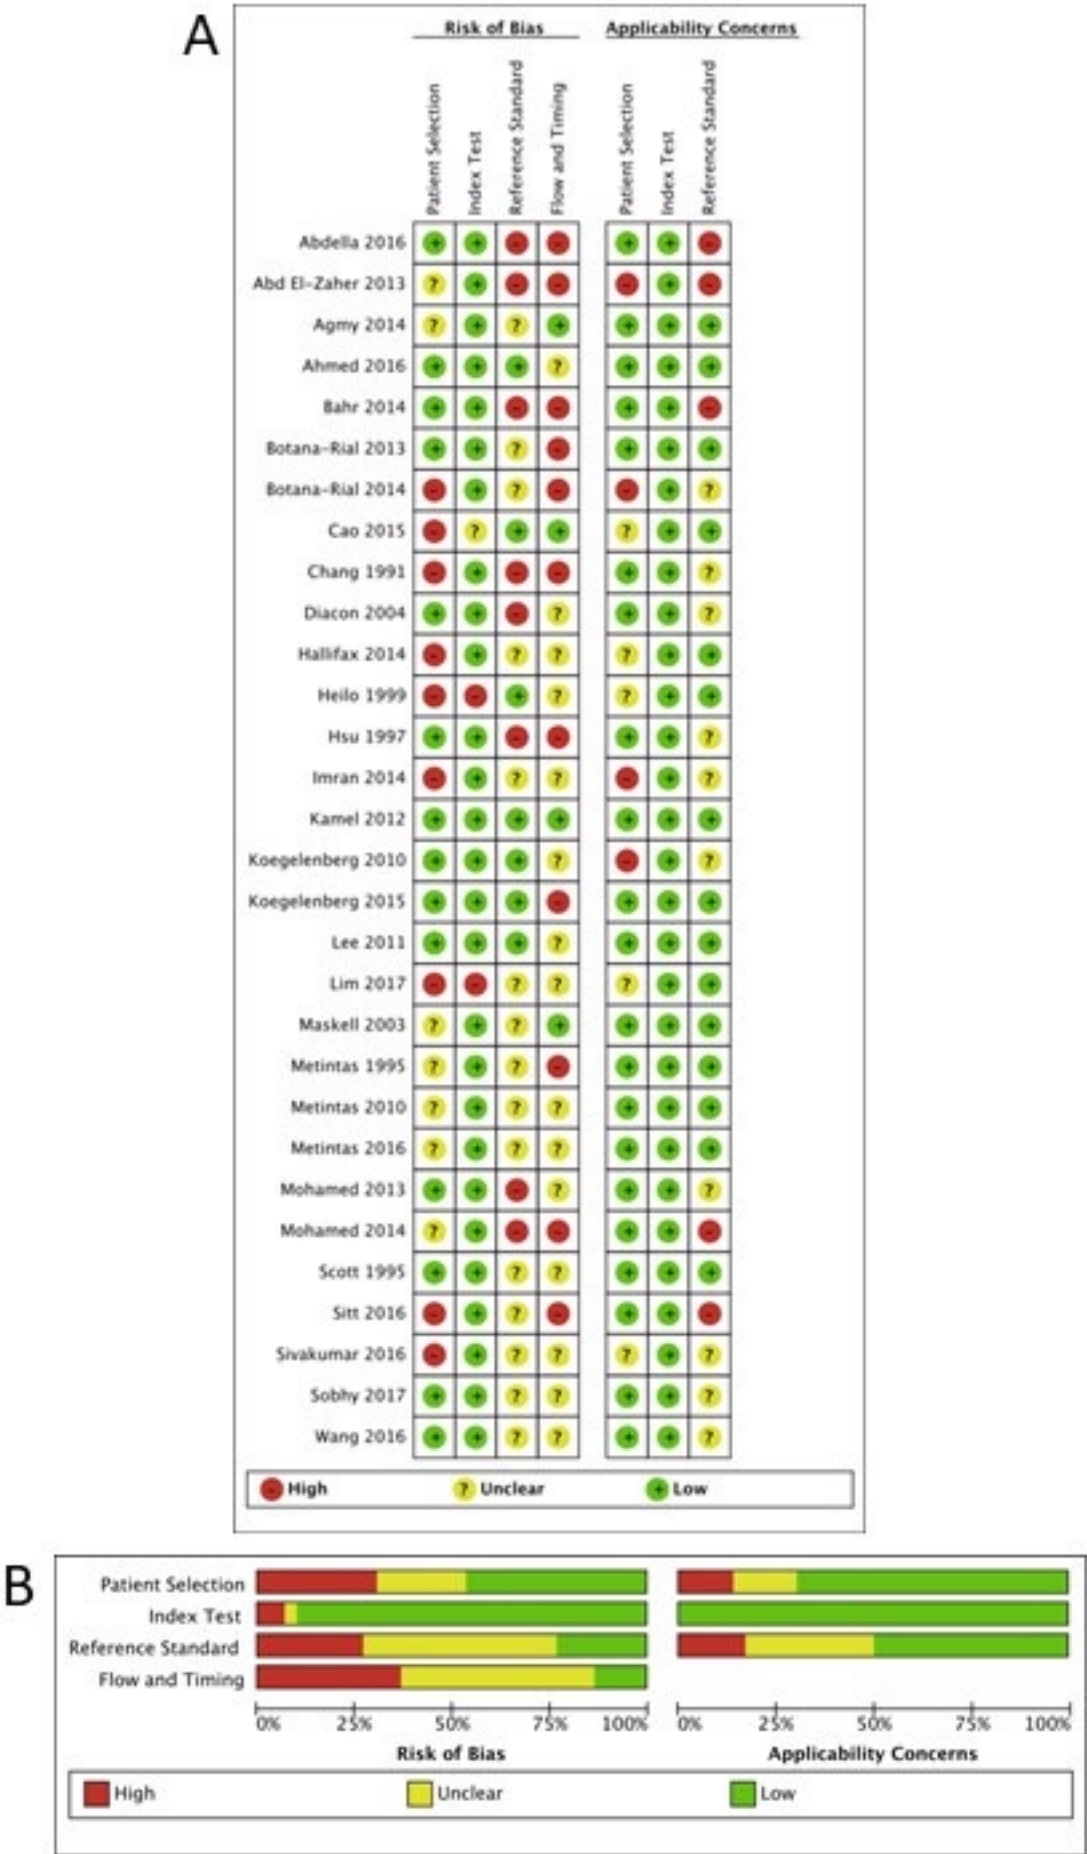

**Fig. S2:** Contour-enhanced funnel plots for TUS-guided

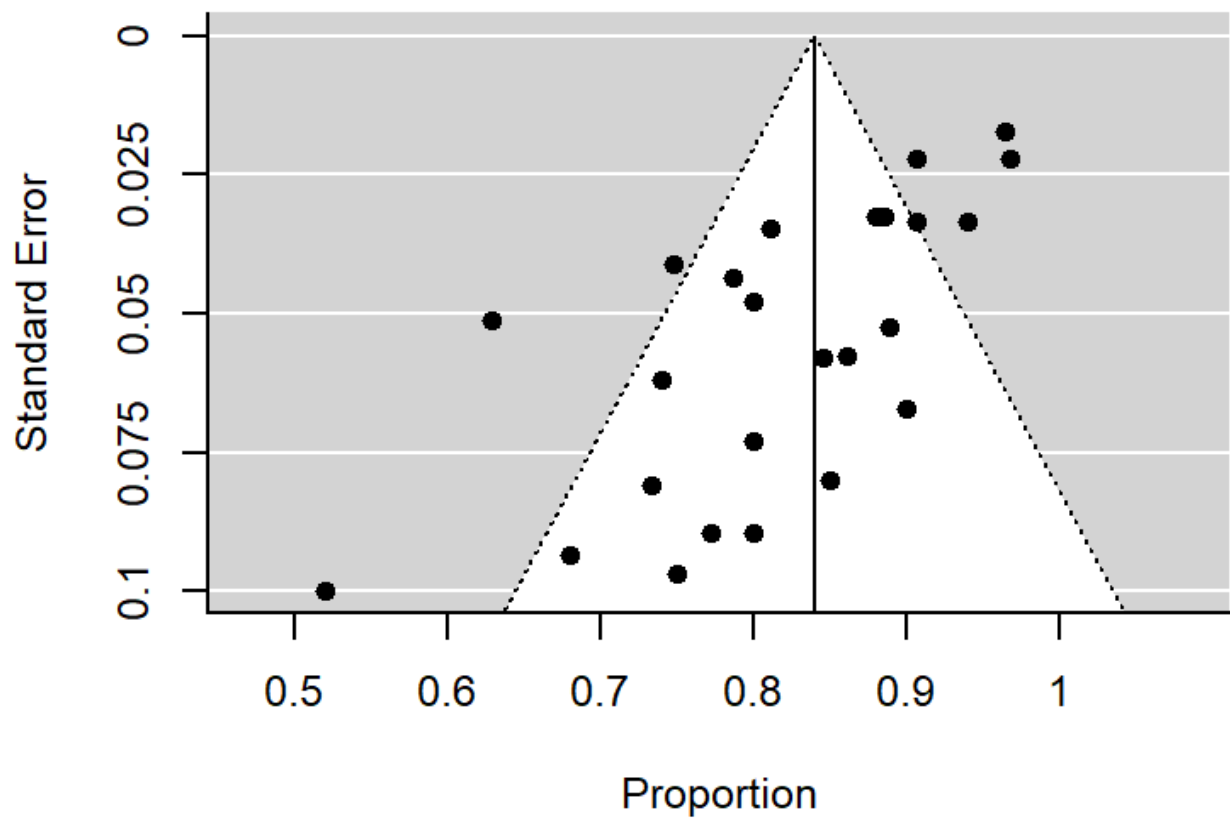

**Fig. S3:** Contour-enhanced funnel plots for CT-guided

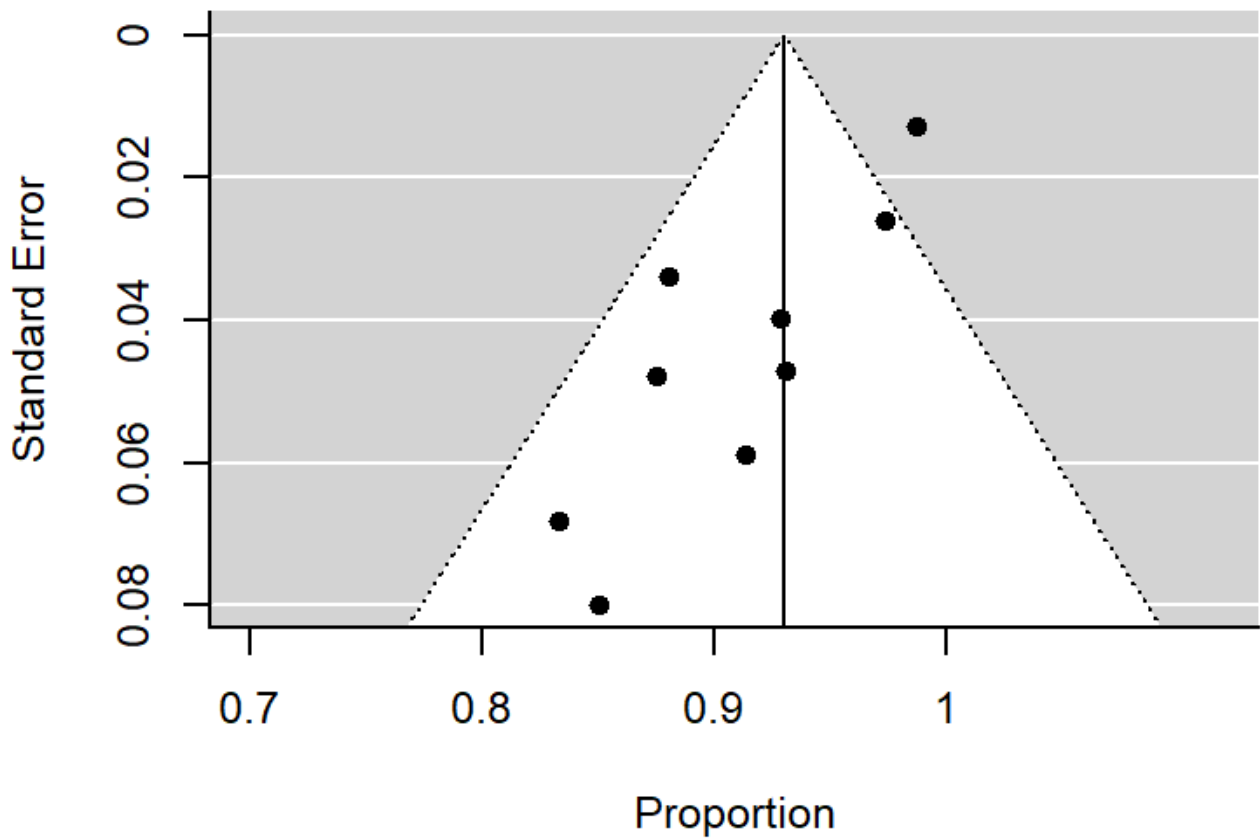

Supplement: Supplementary file 1 [file 1]
